# Supplementary material
Source: publisher figshare collection journal article supplement (https://acs.figshare.com/ndownloader/files/13247606)
Supplement: Supplementary file 1 [file 13247606]

# **Plasmonically Enhanced Spectral Upconversion for Improved Performance of GaAs Solar Cells under Nonconcentrated Solar Illumination**

Huandong Chen, Sung-Min Lee, Angelo Montenegro, Dongseok Kang, Boju Gai, Haneol Lim, Chayan Dutta, Wanting He, Minjoo Larry Lee, Alexander Benderskii, and Jongseung Yoon\*

## **Table of Contents**

|                                         |          |
|-----------------------------------------|----------|
| <b>1. Supplementary Methods .....</b>   | <b>2</b> |
| <b>2. Supplementary Figures .....</b>   | <b>5</b> |
| <b>3. Supplementary Table.....</b>      | <b>8</b> |
| <b>4. Supplementary References.....</b> | <b>9</b> |

## 1. Supplementary Methods

**Fabrication of Ultrathin GaAs Microscale Solar Cells.** Epitaxial stacks of ultrathin GaAs solar cells were grown on a (100) semi-insulating wafer by molecular beam epitaxy (MBE)<sup>1</sup>. The preparation of ultrathin GaAs microcells started with the formation of an n-type metal contact (Pd/Ge/Au = 5 nm/35 nm/80 nm) by electron-beam evaporation (Temescal) and liftoff process. Active cell areas ( $\sim 500 \times 500 \mu\text{m}^2$ ) were defined by photolithography (AZ1518, Merck KGaA) and successive wet chemical etching of n<sup>+</sup>-GaAs top contact layer in a mixture (4:1, by volume) of citric acid (150 g of citric acid monohydrate ( $\geq 99.0\%$ , Sigma-Aldrich) in 124.5 mL deionized (DI) water) and hydrogen peroxide (H<sub>2</sub>O<sub>2</sub>, 30-32%, Macron), n-Al<sub>0.4</sub>Ga<sub>0.6</sub>As window in citric acid /H<sub>2</sub>O<sub>2</sub> (20:1, by volume), and n-GaAs (50 nm) / p-GaAs (150 nm) in citric acid / H<sub>2</sub>O<sub>2</sub> (4:1, by volume). Subsequently, a recessed p-type contact ( $\sim 240 \times 40 \mu\text{m}^2$ ) was made within the cell boundary by depositing metals (Pt/Ti/Pt/Au = 10 nm/40 nm/10 nm/80 nm) on the Al<sub>0.3</sub>Ga<sub>0.7</sub>As back-surface field layer and thermal annealing (175°C in N<sub>2</sub> atmosphere, 1 h), followed by the formation of additional mesa structures ( $\sim 580 \times 580 \mu\text{m}^2$ ) to isolate individual microcells. The selective etching of Al<sub>0.95</sub>Ga<sub>0.05</sub>As sacrificial layer was performed in HCl/DI water (1:6, by volume) with a photoresist anchor structure and etch holes located outside of the active junction area. After the completion of undercut etching microcell were individually released by an elastomeric stamp with relief features ( $\sim 600 \times 600 \mu\text{m}^2$ ) made of PDMS (Sylgard 184, Dow Corning), followed by wet chemical etching of p<sup>+</sup>-GaAs in citric acid/H<sub>2</sub>O<sub>2</sub> (4:1, by volume).

**Fabrication of Plasmonically Engineered Upconversion Solar Module.** A plasmonic reflector consisting of hole-post hybrid silver nanostructure was fabricated through previously reported procedures<sup>2, 3</sup>. Starting with the soft-imprinting of hexagonally periodic nanohole arrays ( $p_{hole} =$

~700 nm,  $h_{hole} = \sim 300$  nm,  $D_{hole} = \sim 570$  nm) on a 1.5- $\mu$ m-thick thermally curable polymer (SU-8 2, Microchem) spin-coated on a silicon substrate, the hole-post hybrid silver nanostructure ( $p_{hole} = \sim 700$  nm,  $h_{hole} = \sim 550$  nm,  $D_{hole} = \sim 490$  nm,  $h_{post} = \sim 260$  nm,  $D_{post} = \sim 340$  nm) was formed by angled ( $\sim 15^\circ$ ) electron beam deposition of Cr/Ag (15 nm/550 nm).  $\beta$ -phase NaYF<sub>4</sub>: Yb<sup>3+</sup>, Er<sup>3+</sup> upconversion nanocrystals in toluene solution ( $\sim 3$  wt%) prepared by previously reported procedures<sup>2</sup> was spin-coated (1000 rpm, 10 s) on a plasmonic reflector and baked on a hot plate (70°C, 30 s), followed by spin-coating of PMMA ( $M_n = 996,000$  g/mol, Sigma-Aldrich,  $\sim 13.7$  wt% in toluene, 3000 rpm, 30 s) and baking (120°C, 30 min). Subsequently, thermally curable epoxy (SU-8 2005) was spin-coated (3000 rpm, 30 s) as a transparent waveguiding layer, followed by UV exposure (UVP B-100AP, 5 min) and baking (95°C, 5 min; 120°C, 30 min). Retrieved micro cells with an etched bottom contact were then printed on the composite substrate using a thin ( $\sim 1$   $\mu$ m) photocurable adhesive. To implement a condition of confined illumination, Cr/Au (10 nm/200 nm) was deposited by electron beam evaporation, followed by photolithography and wet chemical etching (gold etchant TFA, Transene; CR-7, KMG Chemicals).

**Optical and Photovoltaic Characterization.** Total (*i.e.* specular + diffuse) reflectance spectra of plasmonic substrates were obtained by a UV/Vis spectrophotometer (LAMBDA 950, PerkinElmer) with an angle of incidence of  $8^\circ$ , where a silver mirror was used as 100% reflectance standard. Photoluminescence spectra of upconversion nanocrystals were measured using 968 nm continuous-wave laser (average power = 1.5 W, intensity = 12 W/cm<sup>2</sup>), where the excitation light was illuminated at near-normal incidence ( $< 5^\circ$ ) to the sample through a collimating lens (EFL = 10 mm). The emitted light was filtered by a 750 nm short-pass filter (Thorlabs) and collected by a spectrometer (Acton SP2500, Princeton Instruments). The current-voltage characteristics of GaAs

microcells were obtained by a semiconductor parameter analyzer (4156C, Agilent technologies) and a full-spectrum solar simulator (94042A, Oriel).

**Optical Modeling.** Reflectance spectra, as well as the local electric-field intensity distribution of hole-post hybrid silver nanostructures were numerically calculated by a finite-difference time-domain method (FDTD, Lumerical Solutions) through procedures adapted from our previous work<sup>2,3</sup>. For the reflectance spectra with 8° incident light, a BFAST (broadband fixed angle source technique) was employed to implement a light source, and the reflectance values were obtained using a broadband frequency-domain power monitor. The refractive index of surrounding medium were fixed at 1 and 1.49, for the case of in air and in PMMA, respectively.

## 2. Supplementary Figures

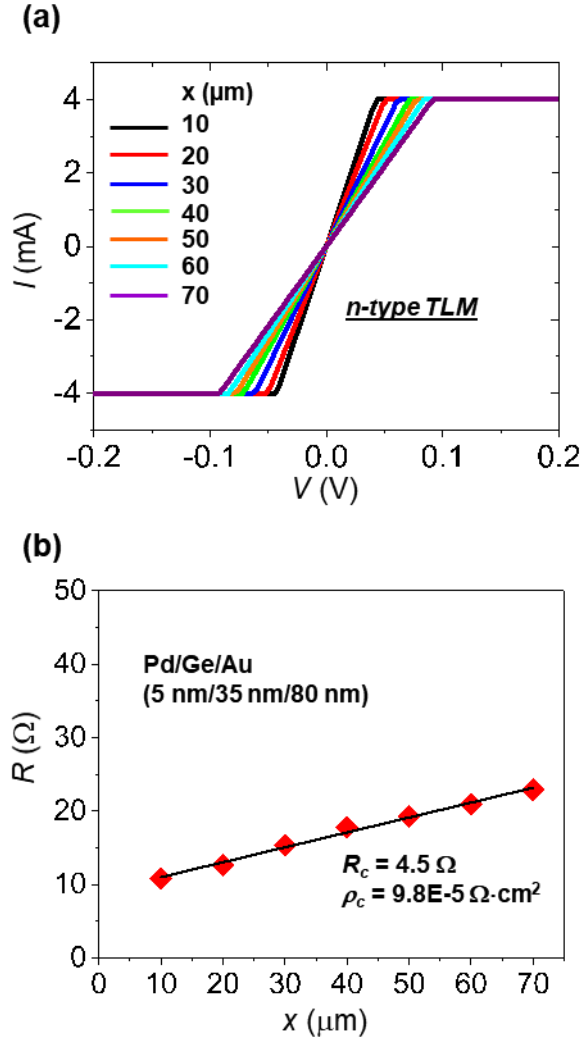

**Figure S1.** (a) Representative current ( $I$ )-voltage ( $V$ ) curves measured between metal pads with varying distances ( $x$ ), and (b) total resistance ( $R$ ) as a function of  $x$  from standard transmission line model (TLM) measurements, where Pd/Ge/Au (5 nm/35 nm/80 nm) were deposited on  $n^+$ -GaAs contact layer and annealed under 175°C, 60 min in 100%  $N_2$  atmosphere.

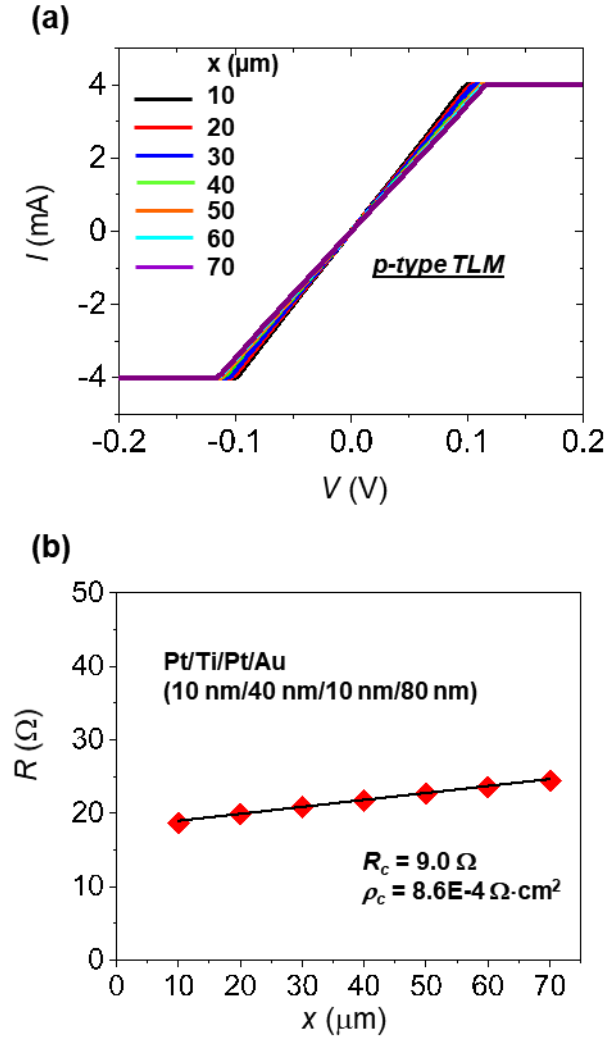

**Figure S2.** (a) Representative current ( $I$ )-voltage ( $V$ ) curves measured between metal pads with varying distances ( $x$ ), and (b) total resistance ( $R$ ) as a function of  $x$  from standard transmission line model (TLM) measurements, where Pt/Ti/Pt/Au (10 nm/40 nm/10 nm/80 nm) were deposited on  $\text{p}^+\text{-Al}_{0.3}\text{Ga}_{0.7}\text{As}$  back-surface field layer, and annealed under 175°C, 60 min in 100%  $\text{N}_2$  atmosphere.

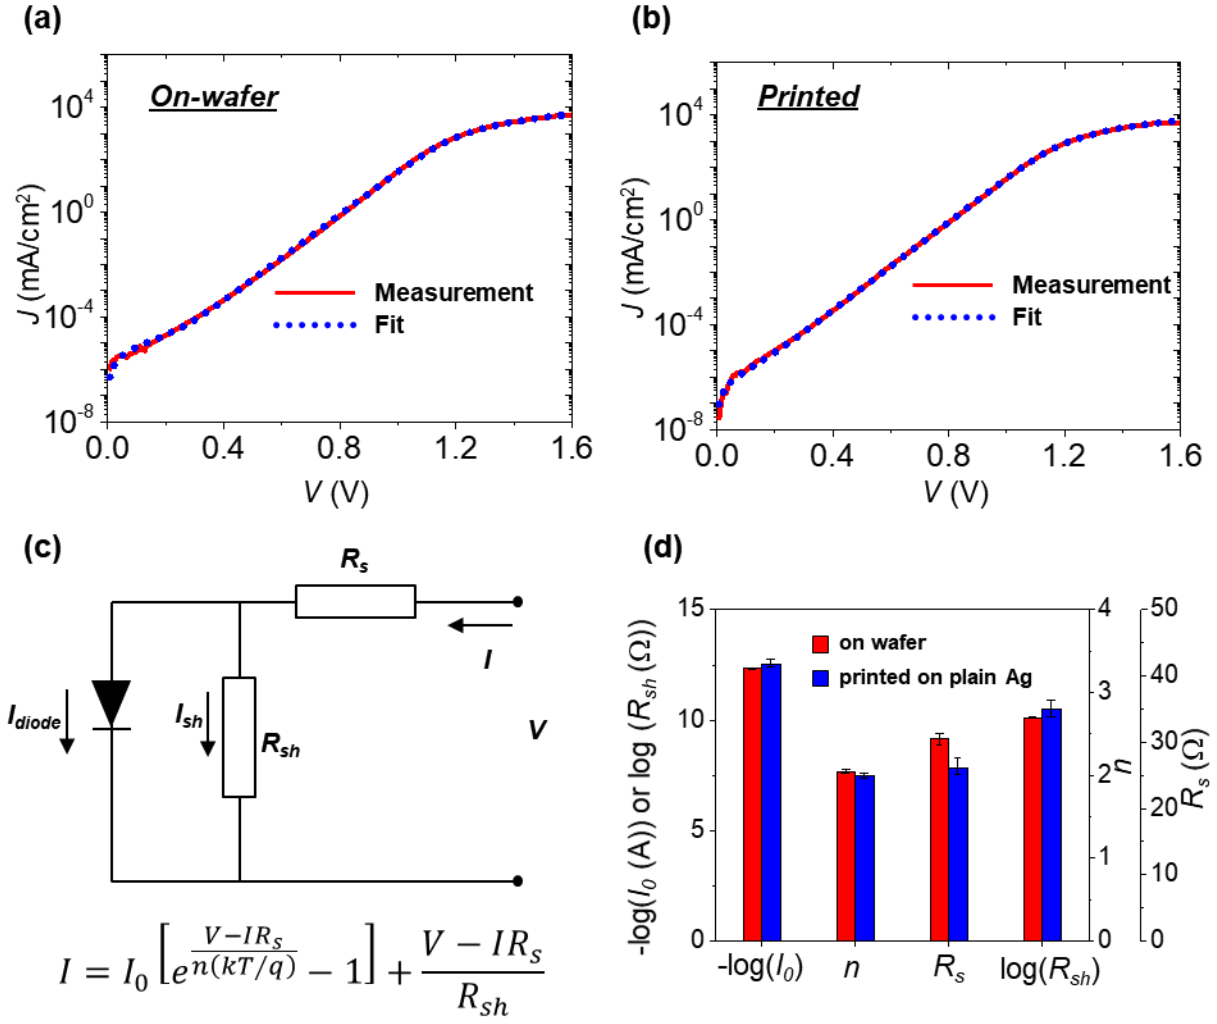

**Figure S3.** Representative dark current density ( $J$ )-voltage ( $V$ ) curves of GaAs solar cells measured (a) on wafer and (b) after transfer printing on a plain silver reflector without removing a bottom contact layer. (c) A single-diode model used to fit the experimental data in (a) and (b), where  $I_0$ ,  $n$ ,  $k$ ,  $T$ ,  $q$ ,  $R_s$ , and  $R_{sh}$  are reverse-bias saturation current, diode ideality factor, Boltzmann constant, absolute temperature, electronic charge, series resistance, and shunt resistance, respectively. (d) Fitted parameters of single-diode model extracted from (a) and (b). Error bars show maximum and minimum values of the error from the average value.

### 3. Supplementary Table

|                     | $I_0$ (A) | $-\log(I_0 \text{ (A)})$ | $n$  | $R_s$ ( $\Omega$ ) | $R_{sh}$ ( $\Omega$ ) |
|---------------------|-----------|--------------------------|------|--------------------|-----------------------|
| on wafer            | 4.74E-13  | 12.33                    | 2.05 | 30.5               | 3.84E+10              |
| printed on plain Ag | 3.01E-13  | 12.53                    | 2.00 | 26.2               | 4.83E+10              |

**Table S1.** Fitted parameters of single-diode model (Figure S3(c)) extracted from dark  $IV$  measurements of GaAs microcells on wafer and after printing on a plain silver reflector, including reverse-bias saturation current ( $I_0$ ), ideality factor ( $n$ ), series resistance ( $R_s$ ), and shunt resistance ( $R_{sh}$ ).



#### 4. Supplementary References

1. Lee, S.-M.; Kwong, A.; Jung, D.; Faucher, J.; Biswas, R.; Shen, L.; Kang, D.; Lee, M. L.; Yoon, J. High Performance Ultrathin GaAs Solar Cells Enabled with Heterogeneously Integrated Dielectric Periodic Nanostructures. *ACS Nano* **2015**, *9*, 10356-10365.
2. Lee, S. M.; Li, W. G.; Dhar, P.; Malyk, S.; Wang, Y.; Lee, W.; Benderskii, A.; Yoon, J. High-Performance Flexible Nanostructured Silicon Solar Modules with Plasmonically Engineered Upconversion Medium. *Advanced Energy Materials* **2015**, *5*, 1500761.
3. Lee, S.-M.; Dhar, P.; Chen, H.; Montenegro, A.; Liaw, L.; Kang, D.; Gai, B.; Benderskii, A. V.; Yoon, J. Synergistically Enhanced Performance of Ultrathin Nanostructured Silicon Solar Cells Embedded in Plasmonically Assisted, Multispectral Luminescent Waveguides. *ACS Nano* **2017**, *11*, 4077-4085.
